# Supplementary material for: A comprehensive adsorption and desorption study on the interaction of DNA oligonucleotides with TiO2 nanolayers
Source: Royal Society of Chemistry journal article supplement (doi:10.1039/d4cp02260b), 2024-01-01
Supplement: d4cp02260b1.pdf [file d4cp02260b1.pdf]

***Supplementary Information for***

**A comprehensive adsorption and desorption study on the interaction of DNA  
oligonucleotides with TiO<sub>2</sub> nanolayer**

Jin Yang <sup>1,2a</sup>, Qiong Su <sup>2a</sup>, Chongyang Song <sup>2</sup>, Haiyan Luo <sup>2</sup>, Hui Jiang <sup>2</sup>, Ming Ni <sup>2\*</sup>, Fanchao  
Meng <sup>3\*</sup>

<sup>1</sup> *College of Life Sciences, University of Chinese Academy of Sciences, Beijing 100049, China*

<sup>2</sup> *MGI Tech, Shenzhen 518083, China*

<sup>3</sup> *Institute for Advanced Studies in Precision Materials, Yantai University, Yantai, Shandong 264005, China*

---

\* Corresponding authors: Dr. Ming Ni, Email: [niming@mgi-tech.com](mailto:niming@mgi-tech.com), Dr. Fanchao Meng, Email: [mengfanchao@ytu.edu.cn](mailto:mengfanchao@ytu.edu.cn).

<sup>a</sup> Authors contributed equally to this work.

**Table S1.** pH values of 20 mM MES solution mixed with DNA oligonucleotides or metal ions

| Solution                                             | pH value |
|------------------------------------------------------|----------|
| 20 mM MES solution                                   | 3.93     |
| 20 mM MES solution with 10 nM Poly5A_Cy3             | 3.93     |
| 20 mM MES solution with 50 mM Na <sup>+</sup>        | 3.84     |
| 20 mM MES solution with 200 mM Na <sup>+</sup>       | 3.91     |
| 20 mM MES solution with 200 $\mu$ M Ca <sup>2+</sup> | 3.99     |
| 20 mM MES solution with 20 mM Ca <sup>2+</sup>       | 3.89     |
| 20 mM MES solution with 200 $\mu$ M Mg <sup>2+</sup> | 3.94     |
| 20 mM MES solution with 20 mM Mg <sup>2+</sup>       | 3.87     |
| 20 mM MES solution with 200 $\mu$ M Zn <sup>2+</sup> | 3.99     |
| 20 mM MES solution with 1 mM Zn <sup>2+</sup>        | 4.04     |
| 20 mM MES solution with 5 mM Zn <sup>2+</sup>        | 4.39     |
| 20 mM MES solution with 20 mM Zn <sup>2+</sup>       | 4.89     |
| 20 mM MES solution with 200 $\mu$ M Ce <sup>3+</sup> | 3.95     |
| 20 mM MES solution with 500 $\mu$ M Ce <sup>3+</sup> | 3.92     |
| 20 mM MES solution with 1 mM Ce <sup>3+</sup>        | 3.89     |
| 20 mM MES solution with 2 mM Ce <sup>3+</sup>        | 3.92     |
| 20 mM MES solution with 5 mM Ce <sup>3+</sup>        | 3.89     |

The adsorption and desorption results in the citrate buffer are presented in **Fig. S1**, and the pH was set to 3.93 for direct comparison with the MES solution. **Fig. S1a** showed that Poly5A\_Cy3 had similar adsorption kinetics for both acidic environments. The exception is that the initial adsorption rate of Poly5A\_Cy3 in the citrate buffer was lower than that in the MES solution, which may be caused by the interruption of citrate adsorption. The desorption in the citrate buffer was carried out under pH = 3.93, 5.16, 7.22, and 10.12, as shown in **Fig. S1b**. Similar to the scenarios in the MES solution, the desorption is only  $2.12 \pm 0.42\%$  at pH = 3.93. With the increase in pH, the desorption increases and reaches  $37.73 \pm 0.37\%$  at pH = 10.5.

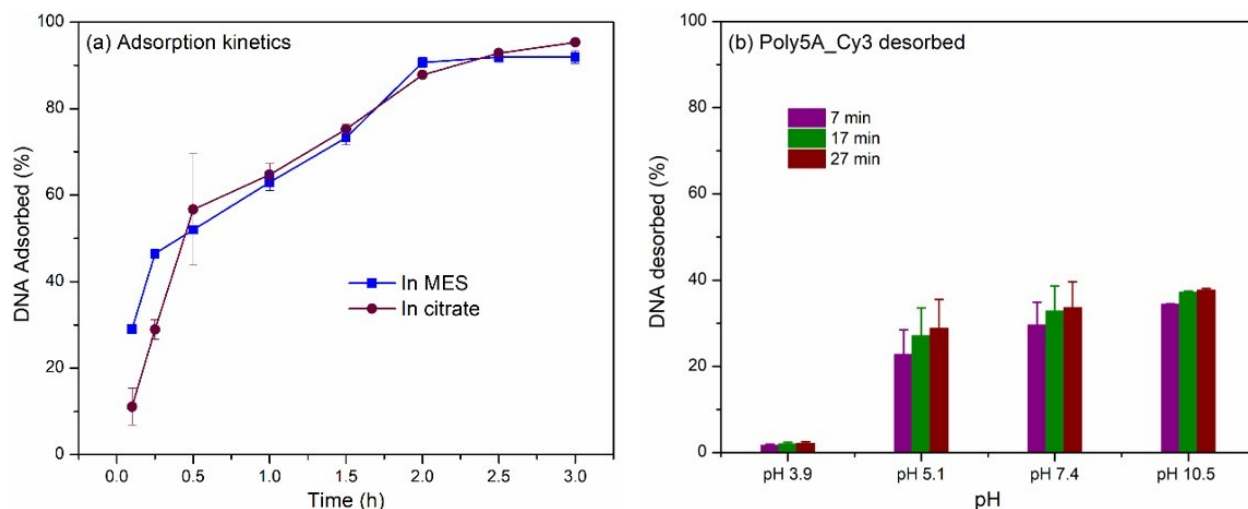

**Fig. S1.** (a) Adsorption kinetics of Poly5A\_Cy3 in MES solution and citrate buffer to TiO<sub>2</sub> nanolayer. (b) Poly5A\_Cy3 desorption percentage under different pH values.

With 10 mM citrate buffer (pH is around 3.93) incubated on the surface of the TiO<sub>2</sub> nanolayer for 1 h, the XPS data showed significant Na<sup>+</sup> adsorption on the TiO<sub>2</sub> nanolayer (**Fig. S2a**), which suggested that Na<sup>+</sup> would be enriched to screen the charges on the surface. For the carbon element, the chemical state of O-C=O was also significantly increased compared with the fresh TiO<sub>2</sub> chip, from 9.51% to 35.09% in the total carbon element (**Fig. S2b**). Considering that one citrate molecule has three carboxyl groups, this suggested that TiO<sub>2</sub> nanolayer could also strongly adsorb citrate molecules.

Moreover, Zhang et al.<sup>1</sup> reported that TiO<sub>2</sub> nanoparticles would adsorb citrate to the surface and the Zeta potential was significantly changed compared to bare nanoparticles. During the interaction, TiO<sub>2</sub> would transform to TiOH at a lower pH. We infer that citrate could interact with the TiO<sub>2</sub> nanolayer through a hydrogen bond between the carboxyl group and hydroxide group.<sup>2</sup>

Furthermore, the citrate adsorption can also be verified by pre-adsorption experiments. As the pre-adsorption of citrate would disturb the adsorption of DNA oligonucleotides by rendering a

negatively charged surface, we incubated the small TiO<sub>2</sub> chips with 10 mM citrate buffer and 20 mM MES solution (both pH = 3.93) for 15 min, then incubated 20 nM Poly5A\_Cy3 in MES solution for another 15 min. **Fig. S2c** shows that the pre-adsorption of citrate buffer ( $21.73 \pm 4.96\%$ ) results in much less DNA adsorption than MES ( $40.72 \pm 4.98\%$ ), while DNA adsorption in MES solution and citrate buffer are higher than the pre-adsorbed assay, suggesting that both MES and citrate molecules disturb DNA adsorption, and the disturbing effect of citrate is stronger.

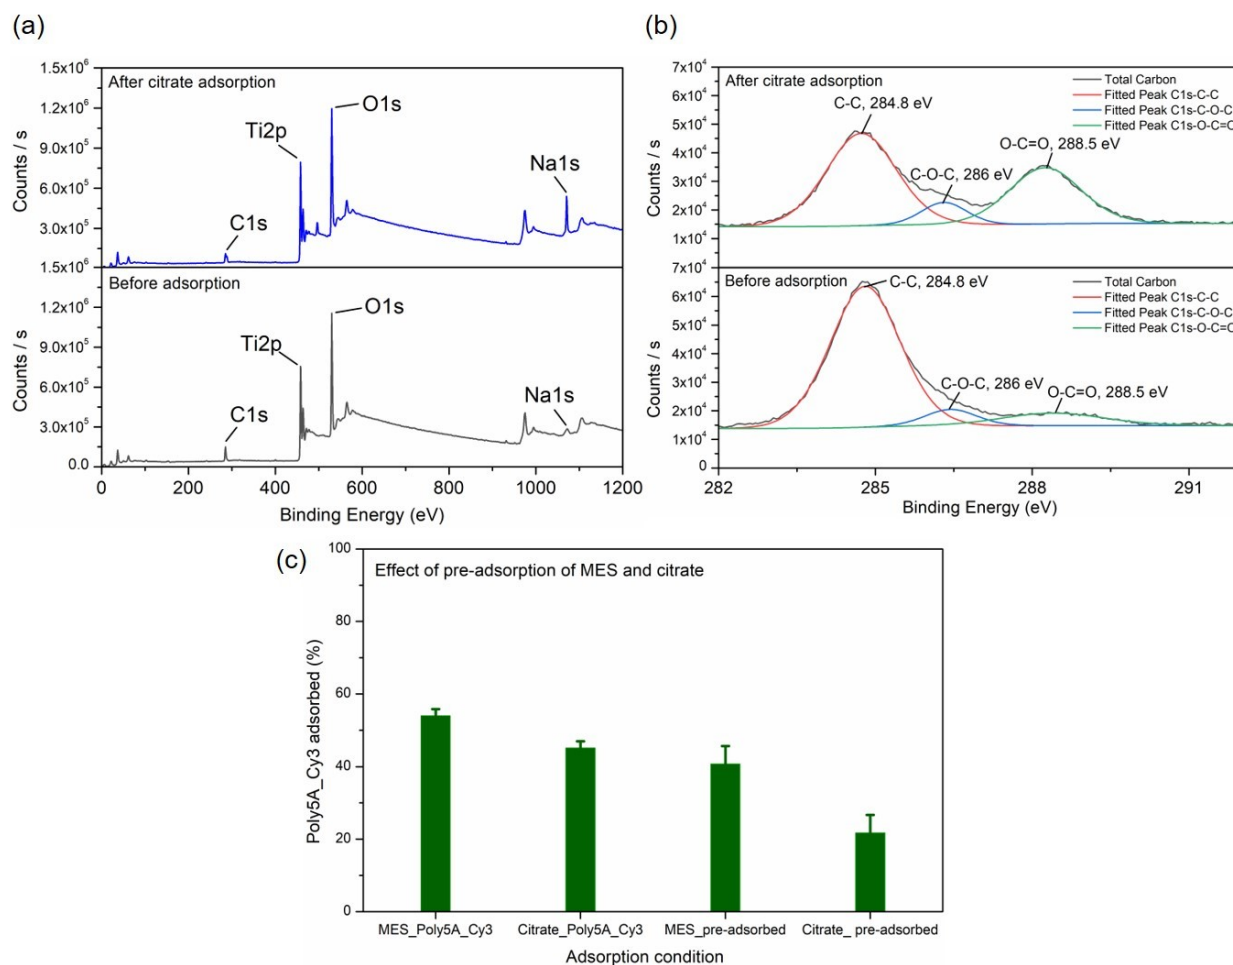

**Figure S2.** (a) XPS survey and (b) fine spectrum of carbon element chemical states before (bottom) and after (top) citrate adsorption. (c) Effect of pre-adsorption of MES solution and citrate buffer

on DNA adsorption, the first two bars represent Poly5A\_Cy3 adsorption in MES solution and citrate buffer without pre-adsorption, respectively.

Some white precipitates were observed when adding a relatively high concentration of  $\text{Zn}^{2+}$  into the HEPES buffer. The precipitates first appeared for 2 mM  $\text{Zn}^{2+}$  and as the  $\text{Zn}^{2+}$  concentration increased to 5, 10, and 20 mM, the precipitates increased as well, as shown in **Fig. S3** below. This observation is consistent with previous studies that reported increased formation of ZnO or  $\text{Zn}(\text{OH})_2$  with the increase of  $\text{Zn}^{2+}$  concentration.<sup>3-5</sup>

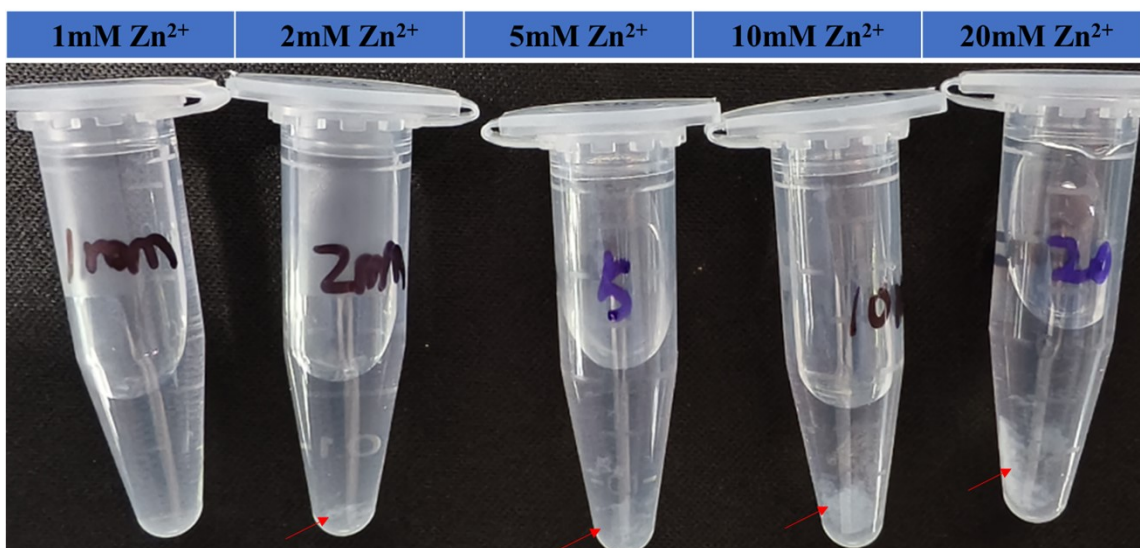

**Fig. S3.** White precipitates pointed by a red arrow after adding different concentrations of  $\text{Zn}^{2+}$  into the HEPES buffer.

## References

1. X. Zhang, F. Wang, B. Liu, E. Y. Kelly, M. R. Servos and J. Liu, *Langmuir*, 2014, **30**, 839-845.
2. T. Granath, K. Mandel and P. Löbmann, *Part. Part. Syst. Charact.*, 2022, **39**, 2100279.
3. A. Krężel and W. Maret, *Arch. Biochem. Biophys.*, 2016, **611**, 3-19.

4. L. Ma, B. Liu, P.-J. J. Huang, X. Zhang and J. Liu, *Langmuir*, 2016, **32**, 5672-5680.
5. W. Zhou, R. Saran and J. Liu, *Chem. Rev.*, 2017, **117**, 8272-8325.
